# Supplementary material for: Human intestinal mucosa-associated Lactobacillus and Bifidobacterium strains with probiotic properties modulate IL-10, IL-6 and IL-12 gene expression in THP-1 cells
Source: Atypon-hosted journal article supplement (doi:10.3920/bm2014.0081), 2014-11-13
Supplement: bm2014-0081_esm.pdf [file bm2014-0081_esm.pdf]

## Human intestinal mucosa-associated *Lactobacillus* and *Bifidobacterium* strains with probiotic properties modulate IL-10, IL-6 and IL-12 gene expression in THP-1 cells

M. Čitar, B. Hacin, G. Tompa, M. Štampelj, I. Rogelj, J. Dolinšek, M. Narat and B. Bogovič Matijašić

**Table S1. Minimum inhibitory concentration (MIC) (µg/ml) of selected antimicrobial agents as determined by E-test assay.**

| Species<br>subspecies                        | or<br>Strain | AM       |       | VA          |      | TP          |       | GM        |     | SM          |      | EM         |            | CM       |       | TC        |       | CL       |      | EF          |      | CI          |      | MZ          |      | KM          |      |
|----------------------------------------------|--------------|----------|-------|-------------|------|-------------|-------|-----------|-----|-------------|------|------------|------------|----------|-------|-----------|-------|----------|------|-------------|------|-------------|------|-------------|------|-------------|------|
|                                              |              | MH       | ISO   | MH          | ISO  | MH          | ISO   | MH        | ISO | MH          | ISO  | MH         | ISO        | MH       | ISO   | MH        | ISO   | MH       | ISO  | MH          | ISO  | MH          | ISO  | MH          | ISO  | MH          | ISO  |
| <i>L. paracasei</i>                          | L248         | 0.25     | 0.19  | >256        | >256 | >256        | >256  | 4         | 2   | 32          | 32   | 0.125      | 0.38       | 0.016    | 0.016 | 1.5       | 1.5   | 2        | 4    | 4           | 4    | 4           | 6    | >256        | >256 | n.t.        | n.t. |
|                                              | L271         | 0.125    | 0.125 | >256        | >256 | >256        | >256  | 2         | 1   | 12          | 12   | 0.125      | 0.047      | 0.016    | 0.016 | 0.25      | 0.25  | 0.5      | 1.5  | 1           | 1    | 0.5         | 0.5  | >256        | >256 | n.t.        | n.t. |
|                                              | L567 m       | 0.25     | 0.19  | >256        | >256 | >256        | >256  | 3         | 1.5 | 12          | 8    | 0.047      | 0.032      | 0.016    | 0.016 | 0.5       | 0.5   | 1.5      | 3    | 3           | 1.5  | 1.5         | 1    | >256        | >256 | n.t.        | n.t. |
|                                              | L350         | 0.25     | 0.19  | >256        | >265 | >256        | >256  | 3         | 1.5 | 12          | 8    | 0.094      | 0.064      | 0.064    | 0.016 | 0.5       | 0.5   | 1        | 1.5  | 3           | 1.5  | 2           | 0.75 | >256        | >256 | 16          | 8    |
|                                              | L150 m       | 0.5      | 0.19  | >256        | >256 | >256        | >256  | 1         | 2   | 64          | 48   | <b>3</b>   | <b>2</b>   | 0.25     | 0.125 | <b>5</b>  | 4     | 1.5      | 1.5  | >32         | >32  | >32         | >32  | >256        | 256  | n.t.        | n.t. |
|                                              | L203 s.m     | 0.25     | 0.25  | >256        | >256 | >256        | >256  | 2         | 1.5 | 8           | 8    | 0.25       | 0.047      | 0.016    | 0.016 | 0.38      | 0.25  | 1        | 0.75 | 3           | 1.5  | 1           | 1    | >256        | >256 | n.t.        | n.t. |
| <b>MICbp</b>                                 |              | <b>4</b> |       | <b>n.r.</b> |      | <b>n.r.</b> |       | <b>32</b> |     | <b>64</b>   |      | <b>1</b>   |            | <b>1</b> |       | <b>4</b>  |       | <b>4</b> |      | <b>n.r.</b> |      | <b>n.r.</b> |      | <b>n.r.</b> |      | <b>64</b>   |      |
| <i>L. fermentum</i>                          | L911         | 0.094    | 0.064 | >256        | >256 | >256        | >256  | 4         | 2   | 24          | 24   | >256       | >256       | 0.016    | 0.016 | >256      | >256  | 1.5      | 1.5  | 4           | 4    | 6           | 8    | >256        | >256 | n.t.        | n.t. |
|                                              | L928         | 0.064    | 0.094 | >256        | >256 | >256        | >256  | 3         | 1   | 24          | 16   | 0.125      | 0.025      | 0.016    | 0.023 | 2         | 2     | 1        | 1.5  | 3           | 4    | 4           | 4    | >256        | >256 | n.t.        | n.t. |
|                                              | L916 b.r     | 0.064    | 0.125 | >256        | >256 | >256        | >256  | 6         | 3   | 32          | 48   | 0.125      | 0.025      | 0.016    | 0.016 | 3         | 3     | 1.5      | 1.5  | 4           | 4    | >32         | >32  | >256        | >256 | n.t.        | n.t. |
|                                              | B912         | 0.125    | 0.067 | >256        | >256 | >256        | >256  | 0.75      | 1   | 12          | 24   | 0.125      | 0.5        | 0.016    | 0.032 | >256      | >256  | 2        | 2    | 4           | 4    | 6           | 3    | >256        | >256 | n.t.        | n.t. |
|                                              | L930 bb      | 0.094    | 0.125 | >256        | >256 | >256        | >256  | 1         | 0.5 | 12          | 12   | 0.125      | 0.125      | 0.016    | 0.016 | 1         | 1.5   | 1.5      | 1    | 4           | 4    | 4           | 4    | >256        | >256 | <b>64</b>   | 24   |
|                                              | B189         | 0.094    | 0.19  | >256        | >256 | >256        | >256  | 3         | 2   | 16          | 24   | 0.25       | 0.38       | 0.016    | 0.016 | >256      | >256  | 2        | 2    | 6           | 6    | 6           | 12   | >256        | >256 | n.t.        | n.t. |
| <b>MICbp</b>                                 |              | <b>2</b> |       | <b>n.r.</b> |      | <b>n.r.</b> |       | <b>16</b> |     | <b>64</b>   |      | <b>1</b>   |            | <b>1</b> |       | <b>8</b>  |       | <b>4</b> |      | <b>n.r.</b> |      | <b>n.r.</b> |      | <b>n.r.</b> |      | <b>32</b>   |      |
| <i>L. rhamnosus</i>                          | L344         | 0.38     | 0.38  | >256        | <256 | >256        | >256  | 8         | 8   | 16          | 16   | 0.75       | 0.38       | 0.5      | 0.125 | 0.5       | 0.5   | 4        | 2    | 1.5         | 1.5  | 1           | 1    | >256        | >256 | 64          | 32   |
|                                              | L930 a       | 0.5      | 0.5   | >256        | >256 | >256        | >256  | 12        | 8   | 24          | 24   | 1          | 1          | 0.75     | 0.25  | 0.38      | 0.25  | 4        | 1.5  | 1           | 0.75 | 0.75        | 0.75 | >256        | >256 | n.t.        | n.t. |
|                                              | L203 p       | 0.25     | 0.25  | >256        | >256 | >256        | >256  | 12        | 6   | 16          | 16   | 0.125      | 0.094      | 0.25     | 0.125 | 0.25      | 0.125 | 3        | 1.5  | 1.5         | 0.75 | 1           | 1    | >256        | >256 | n.t.        | n.t. |
| <b>MICbp</b>                                 |              | <b>4</b> |       | <b>n.r.</b> |      | <b>n.r.</b> |       | <b>16</b> |     | <b>32</b>   |      | <b>1</b>   |            | <b>1</b> |       | <b>8</b>  |       | <b>4</b> |      | <b>n.r.</b> |      | <b>n.r.</b> |      | <b>n.r.</b> |      | <b>64</b>   |      |
| <i>L. plantarum</i>                          | L567v        | 0.094    | 0.094 | >256        | >256 | >256        | >256  | 12        | 6   | 0.48        | 0.48 | <b>1</b>   | <b>4</b>   | 0.125    | 0.125 | 12        | 12    | 1        | 2    | >32         | >32  | >32         | >32  | >256        | >256 | n.t.        | n.t. |
|                                              | L150v        | 1.5      | 1.5   | >256        | >256 | >256        | >256  | 1         | 3   | 64          | 32   | <b>4</b>   | <b>4</b>   | 0.125    | 0.5   | >256      | >256  | 4        | 3    | >32         | >32  | >32         | >32  | >256        | >256 | n.t.        | n.t. |
|                                              | L371         | 0.125    | 0.064 | >256        | >256 | >256        | >256  | 6         | 4   | 48          | 48   | <b>1.5</b> | <b>1.5</b> | 0.25     | 0.094 | >256      | >256  | 4        | 4    | >32         | >32  | >32         | >32  | >256        | >256 | n.t.        | n.t. |
| <b>MICbp</b>                                 |              | <b>2</b> |       | <b>n.r.</b> |      | <b>n.r.</b> |       | <b>16</b> |     | <b>n.r.</b> |      | <b>1</b>   |            | <b>2</b> |       | <b>32</b> |       | <b>8</b> |      | <b>n.r.</b> |      | <b>n.r.</b> |      | <b>n.r.</b> |      | <b>64</b>   |      |
| <i>L. gasseri</i>                            | L916         | 0.047    | 0.125 | >256        | >256 | 0.125       | 0.125 | 6         | 6   | 2           | 6    | 0.125      | 0.25       | 0.25     | 0.75  | 1.5       | 1.5   | 1        | 1    | >32         | >32  | >32         | >32  | >256        | >256 | 32          | 48   |
| <b>MICbp</b>                                 |              | <b>1</b> |       | <b>2</b>    |      | <b>n.r.</b> |       | <b>16</b> |     | <b>16</b>   |      | <b>1</b>   |            | <b>1</b> |       | <b>4</b>  |       | <b>4</b> |      | <b>n.r.</b> |      | <b>n.r.</b> |      | <b>n.r.</b> |      | <b>64</b>   |      |
| <i>B. animalis</i><br>subsp. <i>animalis</i> | IM386        | 0.016    | 0.023 | 0.19        | 0.19 | 0.25        | 0.047 | 48        | 16  | 64          | 24   | 0.125      | 0.094      | 1        | 0.5   | 0.25      | 0.25  | 1        | 0.5  | 2           | 2    | 2           | 2    | 1           | 1    | >256        | >256 |
| <b>MICbp</b>                                 |              | <b>2</b> |       | <b>2</b>    |      | <b>n.r.</b> |       | <b>64</b> |     | <b>128</b>  |      | <b>1</b>   |            | <b>1</b> |       | <b>8</b>  |       | <b>4</b> |      | <b>n.r.</b> |      | <b>n.r.</b> |      | <b>n.r.</b> |      | <b>n.r.</b> |      |

<sup>1</sup> MIC values indicating resistance to antimicrobials are marked bold (> EFSA breakpoint values); MICbp: breakpoint of MIC (EFSA's breakpoints (EFSA, 2012)); n.r.: test not required by EFSA; n.t.: not tested; MH: Mueller Hinton agar; ISO: ISO-sensitest agar; R: resistant; AM: ampicillin; VA: vancomycin; TP: teicoplanin; GM: gentamicin; SM: streptomycin; EM: erythromycin; CM: clindamycin; TC: tetracycline; CL: chloramphenicol; EF: enrofloxacin; CI: ciprofloxacin; MZ: metronidazole.

**Table S2. The survival rate (%) of five isolates from intestinal mucosa and two reference probiotic strains in simulated gastrointestinal conditions. Bacterial strains were exposed to simulated intestinal juice after incubation in simulated gastric juice.**

| Isolate    | Species                            | pH of simulated gastric juice | Survival ratio <sup>1</sup> (%) after 3 h in gastric juice | Survival ratio <sup>1</sup> (%) after 3 h in intestinal juice |
|------------|------------------------------------|-------------------------------|------------------------------------------------------------|---------------------------------------------------------------|
| L344       | <i>L. rhamnosus</i>                | 7                             | 131.51                                                     | 107.98                                                        |
|            |                                    | 3                             | 94.96                                                      | 5.25                                                          |
| L350       | <i>L. paracasei</i>                | 7                             | 73.95                                                      | 154.38                                                        |
|            |                                    | 3                             | 93.69                                                      | 0.50                                                          |
| L916       | <i>L. gasseri</i>                  | 7                             | 95.04                                                      | 22.55                                                         |
|            |                                    | 3                             | 100.44                                                     | 0.80                                                          |
| L930<br>bb | <i>L. fermentum</i>                | 7                             | 66.62                                                      | 52.12                                                         |
|            |                                    | 3                             | 81.64                                                      | 15.36                                                         |
| IM386      | <i>B. animalis subsp. animalis</i> | 7                             | 81.34                                                      | 52.30                                                         |
|            |                                    | 3                             | 71.31                                                      | 20.40                                                         |
| LGG*       | <i>L. rhamnosus</i>                | 7                             | 108.81                                                     | 57.51                                                         |
|            |                                    | 3                             | 84.29                                                      | 1.26                                                          |
| BB-12*     | <i>B. animalis subsp. lactis</i>   | 7                             | 68.07                                                      | 70.60                                                         |
|            |                                    | 3                             | 14.57                                                      | 0.44                                                          |

<sup>1</sup>Survival ratio (%) = (final viability (cfu/ml) / initial viability (cfu/ml))×100.

Each number represents the mean value from two trials carried out in two parallels.

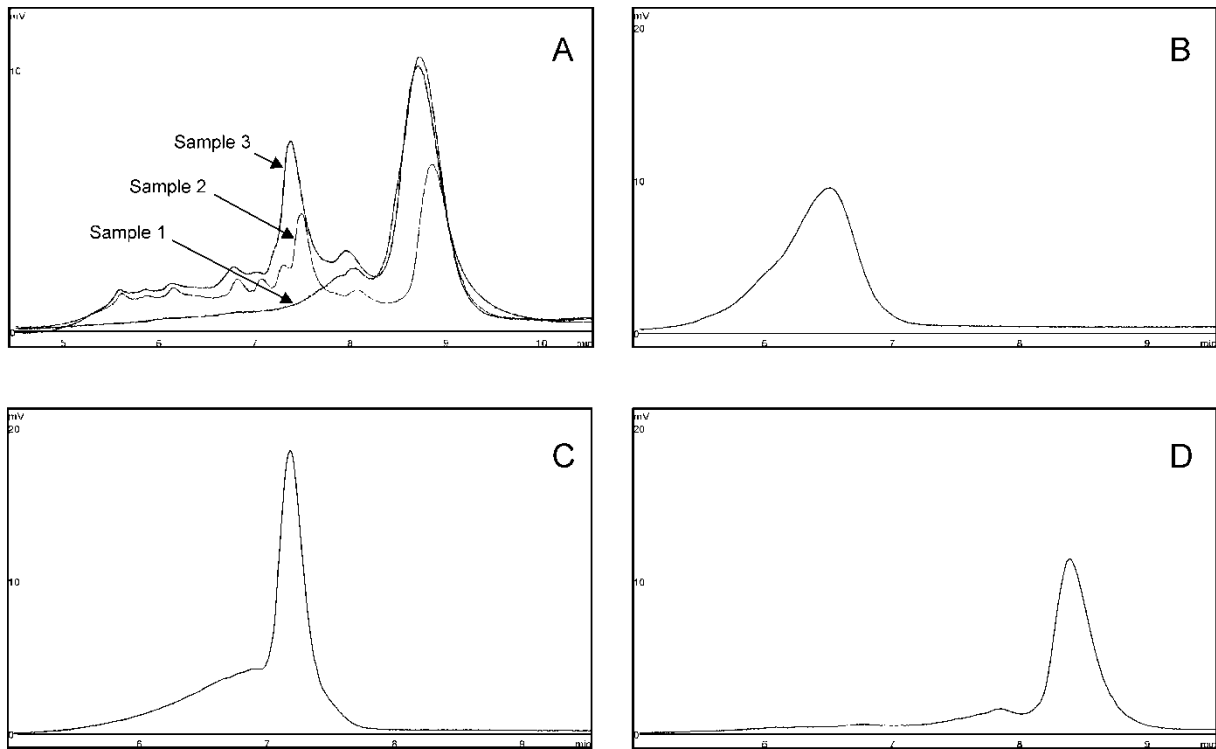

**Figure S1. Representative DHPLC profiles of pure and mixed bacterial cultures (A). Sample 1 is a pure culture, samples 2 and 3 represent mixed cultures. Additional images represent pure cultures of different *Lactobacillus* species: (B) *L. plantarum*, (C) *L. paracasei* and (D) *L. fermentum*. The peaks with different retention times (x – axis) represent different bacterial species.**

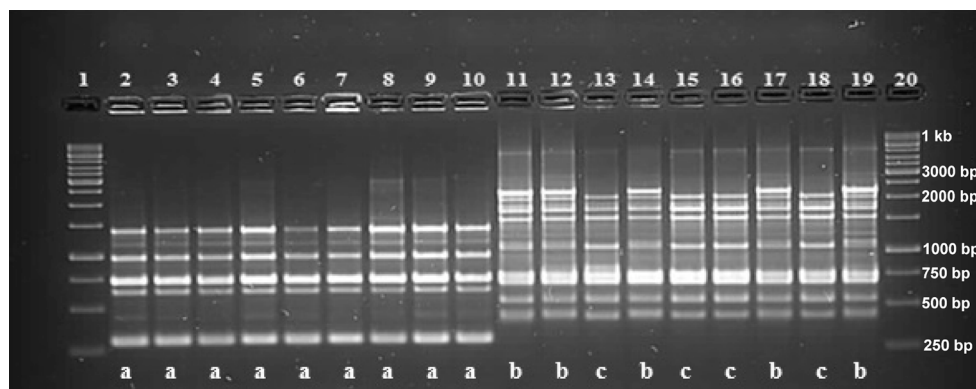

**Figure S2. An example of RAPD-PCR profile using primer 1254. Lanes 1 and 20: 1 – kbp DNA molecular weight marker; lanes 2-6: profile of isolates from ileal sample of the first donor; lanes 7-10: profile of isolates from colonic sample of the first donor; 11-14: profile of isolates from the second donor, ileum; lanes 15-19: profile of isolates from the second donor, colon. The letters on the bottom of the figure indicate different RAPD profiles (a, b, c).**
